# Supplementary material
Source: PubMed Central journal article supplement (PMC4109727)
Supplement: NIHMS555120-supplement-02.pdf [file NIHMS555120-supplement-02.pdf]

**Figure 1: Markov Model Visual Acuity and Health States for Neovascular Age-Related Macular Degeneration**

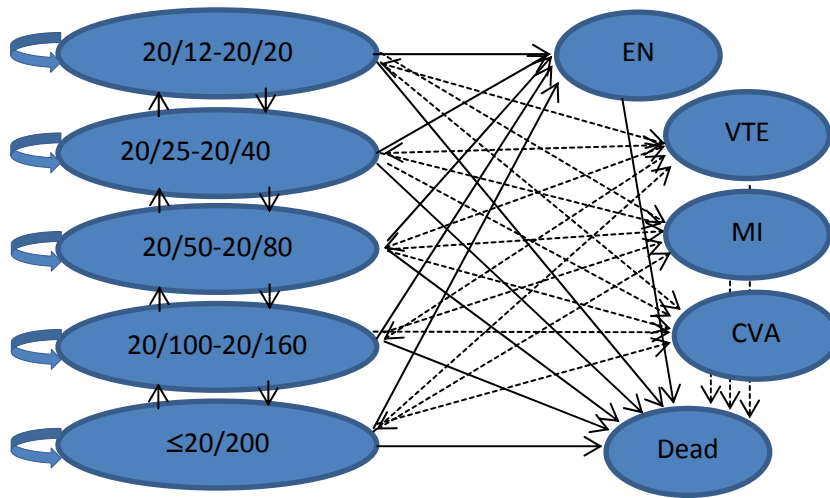

Ovals represent levels of visual acuity and arrows represent possible annual changes in vision. Dotted lines represent secondary analysis including VTE, MI, and CVA outcomes. Individuals have costs for an EN, VTE, MI, and CVA event. Individuals with MI, CVA and blindness from EN have long-term costs. Individuals with VTE only have the short-term costs of the event.

EN = long-term blindness from endophthalmitis; VTE = venous thrombotic event; MI = myocardial infarction; CVA = cerebrovascular accident
